# Supplementary figures and images for: Performance of Face Recognition System Using Gradient Laplacian Operators and New Features Extraction Method Based on Linear Regression Slope
Source: Hindawi journal article supplement (doi:10.1155/2018/1929836), 2018-09-24

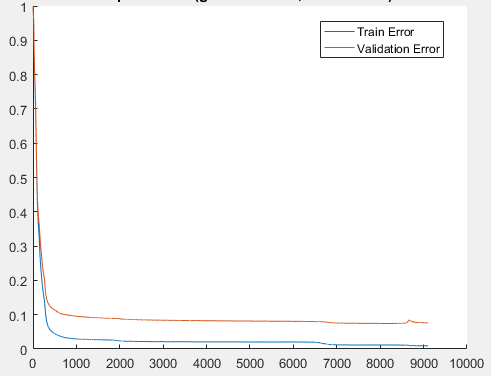

Supplement: f1 [file 1929836.f1.zip › 1929836.f1/Fig. s11.png]

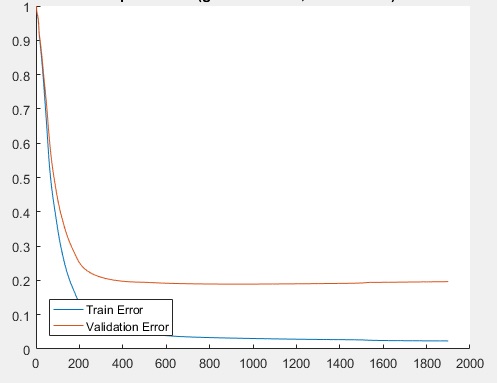

Supplement: f1 [file 1929836.f1.zip › 1929836.f1/Fig. s12.jpg]

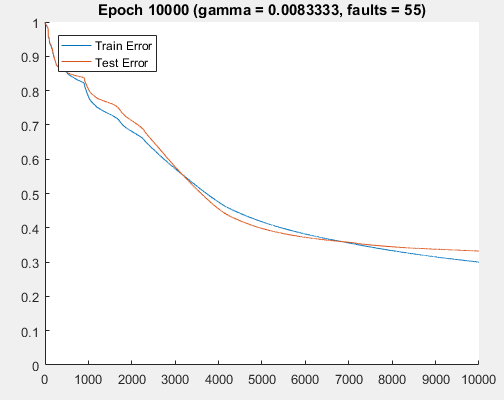

Supplement: f1 [file 1929836.f1.zip › 1929836.f1/Fig. s17.png]

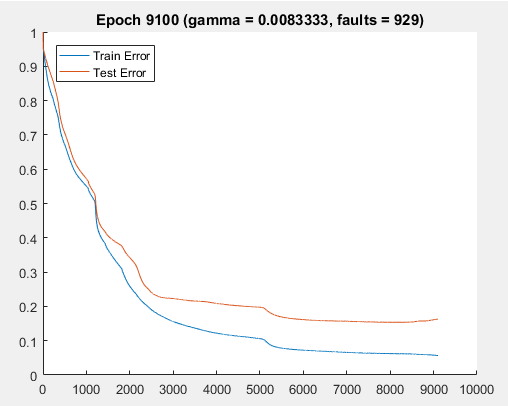

Supplement: f1 [file 1929836.f1.zip › 1929836.f1/Fig. s18.png]

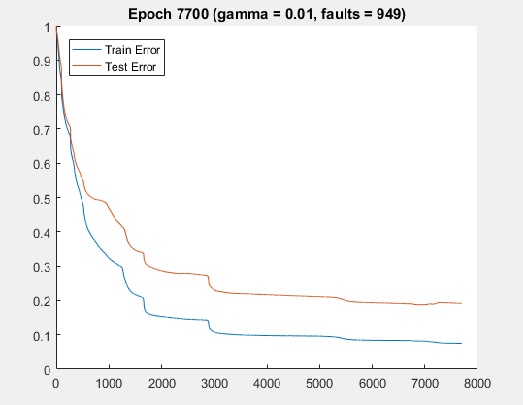

Supplement: f1 [file 1929836.f1.zip › 1929836.f1/Fig. s19.png]

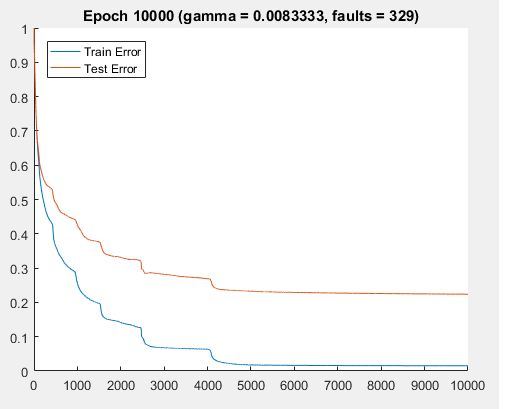

Supplement: f1 [file 1929836.f1.zip › 1929836.f1/Fig. s20.png]

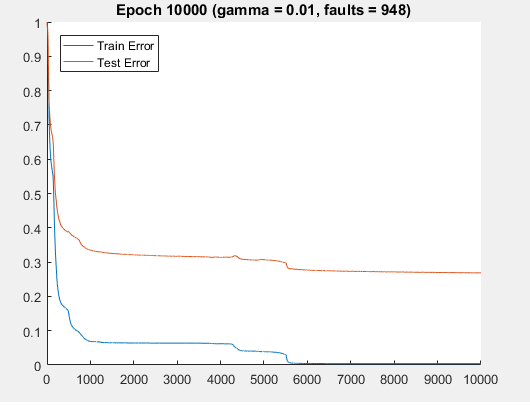

Supplement: f1 [file 1929836.f1.zip › 1929836.f1/Fig. s26.png]

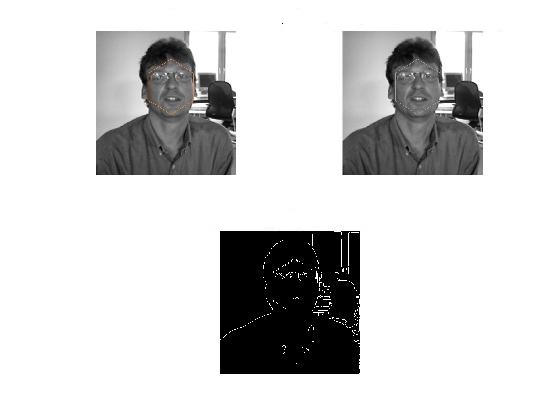

Supplement: f1 [file 1929836.f1.zip › 1929836.f1/Fig.1s Sobel Filter.jpg]

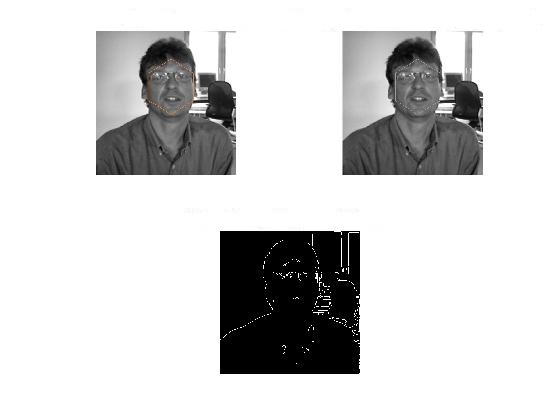

Supplement: f1 [file 1929836.f1.zip › 1929836.f1/Fig.2s Prewitt Filter.jpg]

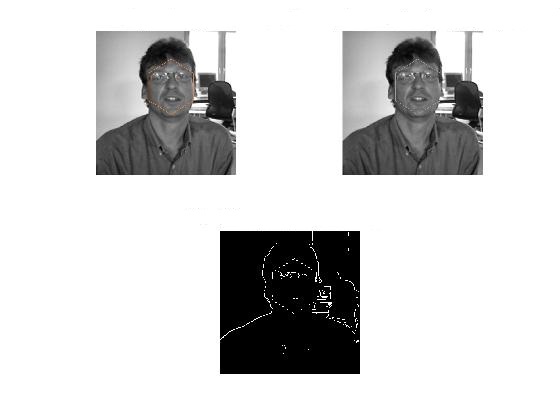

Supplement: f1 [file 1929836.f1.zip › 1929836.f1/Fig.3s Roberts Filter.jpg]

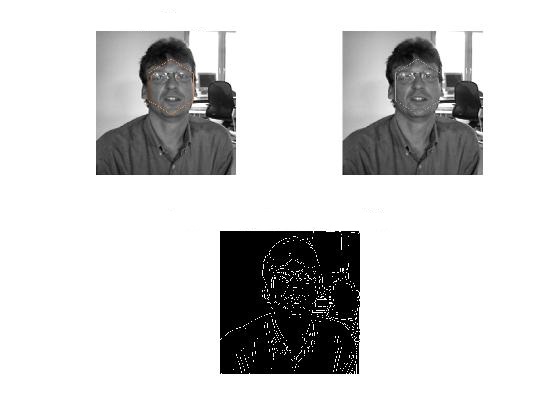

Supplement: f1 [file 1929836.f1.zip › 1929836.f1/Fig.4s Zerocross Filter.jpg]

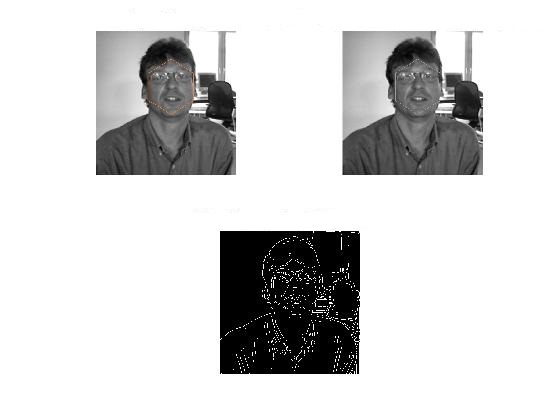

Supplement: f1 [file 1929836.f1.zip › 1929836.f1/Fig.5s LoG Filter.jpg]

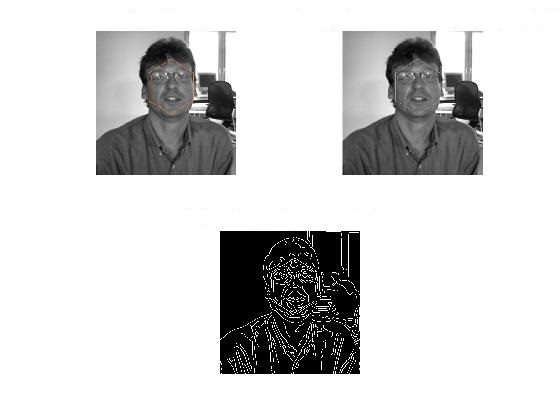

Supplement: f1 [file 1929836.f1.zip › 1929836.f1/Fig.6s Canny Filter.jpg]

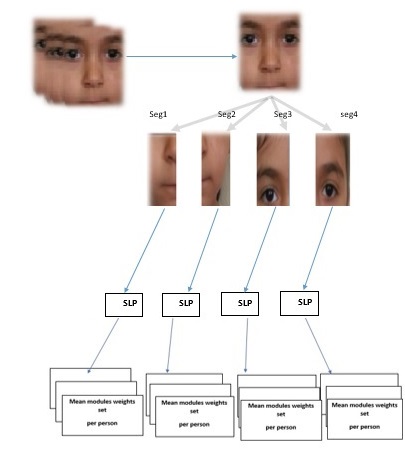

Supplement: f1 [file 1929836.f1.zip › 1929836.f1/Fig.7s Segmentation with SLP.jpg]

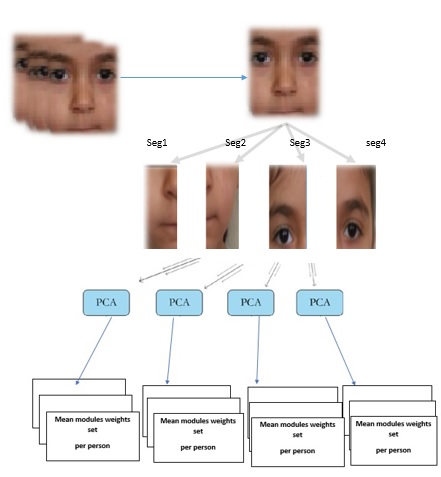

Supplement: f1 [file 1929836.f1.zip › 1929836.f1/Fig.8s Segmntation with PCA.jpg]

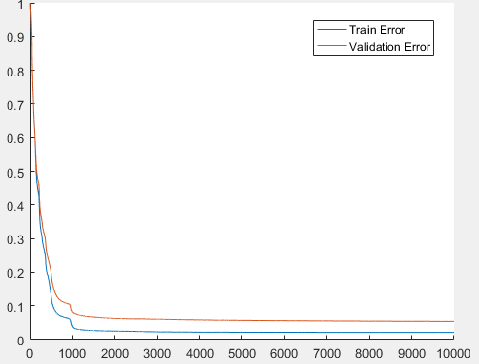

Supplement: f1 [file 1929836.f1.zip › 1929836.f1/Fig.s 27.png]

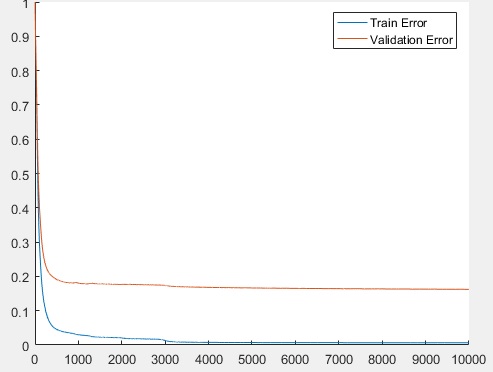

Supplement: f1 [file 1929836.f1.zip › 1929836.f1/Fig.s10.jpg]

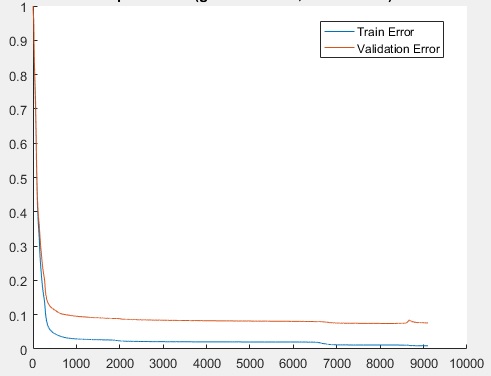

Supplement: f1 [file 1929836.f1.zip › 1929836.f1/Fig.s13.jpg]

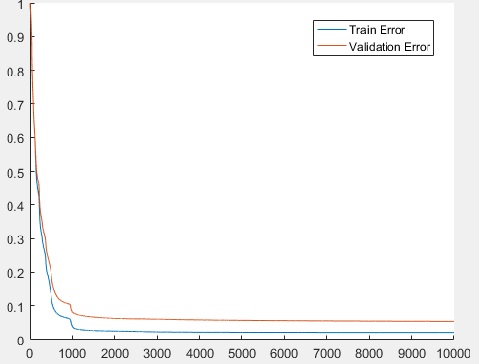

Supplement: f1 [file 1929836.f1.zip › 1929836.f1/Fig.s14.jpg]

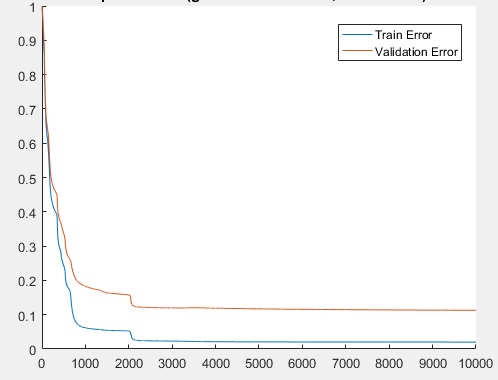

Supplement: f1 [file 1929836.f1.zip › 1929836.f1/Fig.s15.jpg]

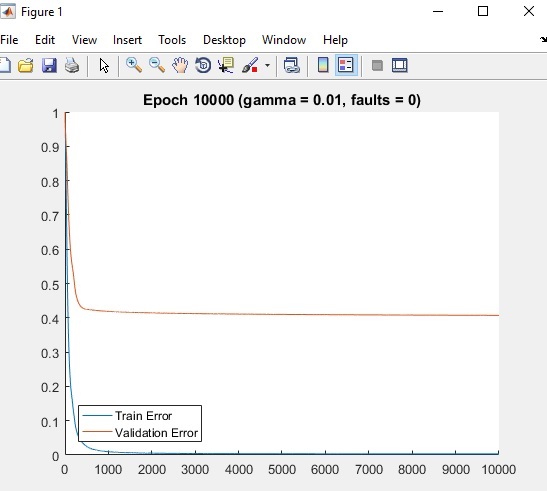

Supplement: f1 [file 1929836.f1.zip › 1929836.f1/Fig.s16.jpg]

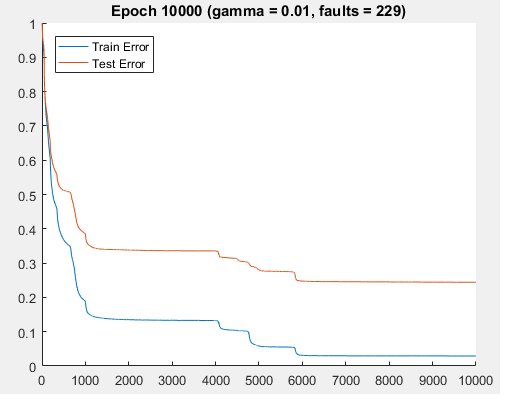

Supplement: f1 [file 1929836.f1.zip › 1929836.f1/Fig.s21.png]

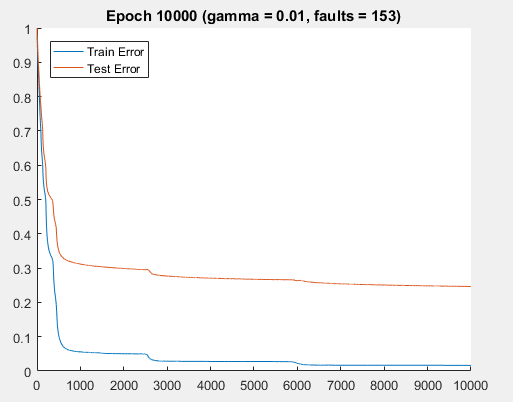

Supplement: f1 [file 1929836.f1.zip › 1929836.f1/Fig.s22.png]

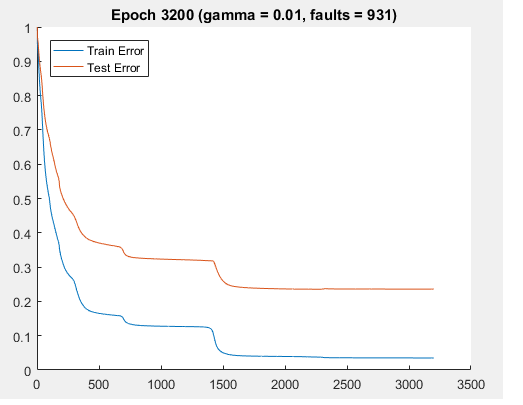

Supplement: f1 [file 1929836.f1.zip › 1929836.f1/Fig.s23.png]

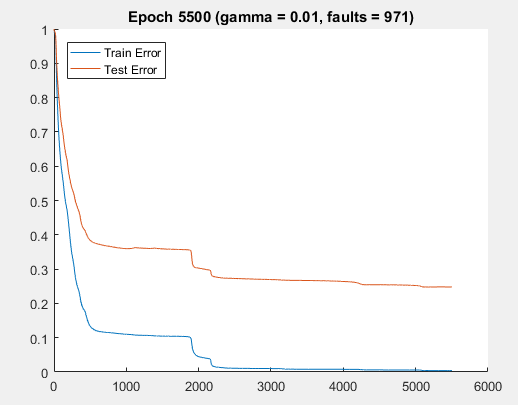

Supplement: f1 [file 1929836.f1.zip › 1929836.f1/Fig.s24.png]

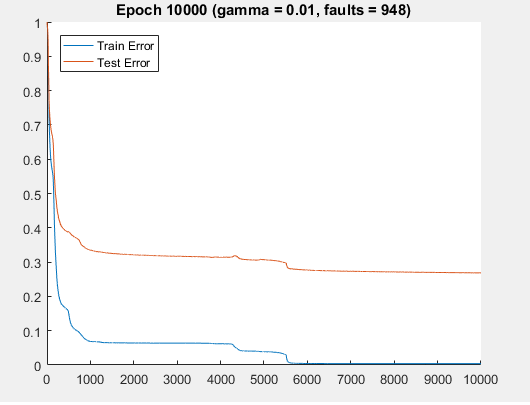

Supplement: f1 [file 1929836.f1.zip › 1929836.f1/Fig.s25.png]

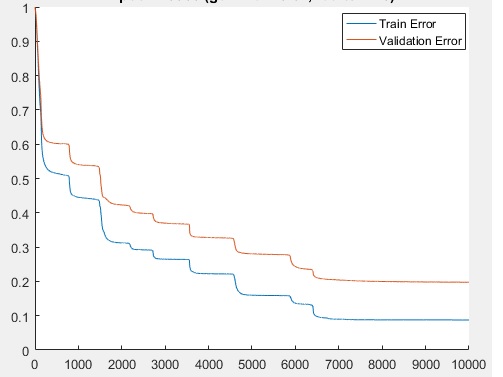

Supplement: f1 [file 1929836.f1.zip › 1929836.f1/Fig.s9.jpg]
